# Supplementary material for: Tandem ZnCo-porphyrin metal–organic frameworks for enhanced photoreduction of CO2
Source: Royal Society of Chemistry journal article supplement (doi:10.1039/d2qi00845a), 2022-01-01
Supplement: d2qi00845a1.pdf [file d2qi00845a1.pdf]

# Tandem ZnCo-porphyrin Metal-Organic Frameworks for Enhanced Photoreduction of CO<sub>2</sub>

Xuyang Chen<sup>a</sup>, Meiyu Cong<sup>a</sup>, Ming Tang<sup>a,b</sup>, Jinxuan Liu<sup>a</sup>, Shaoyun Chen<sup>a</sup>, and Yan Gao<sup>a\*</sup>

<sup>a</sup> State Key Laboratory of Fine Chemicals, Dalian University of Technology (DUT), Dalian 116024, China

<sup>b</sup>North Huajin Chemical Industries Group Corporation, Panjin 124000, China

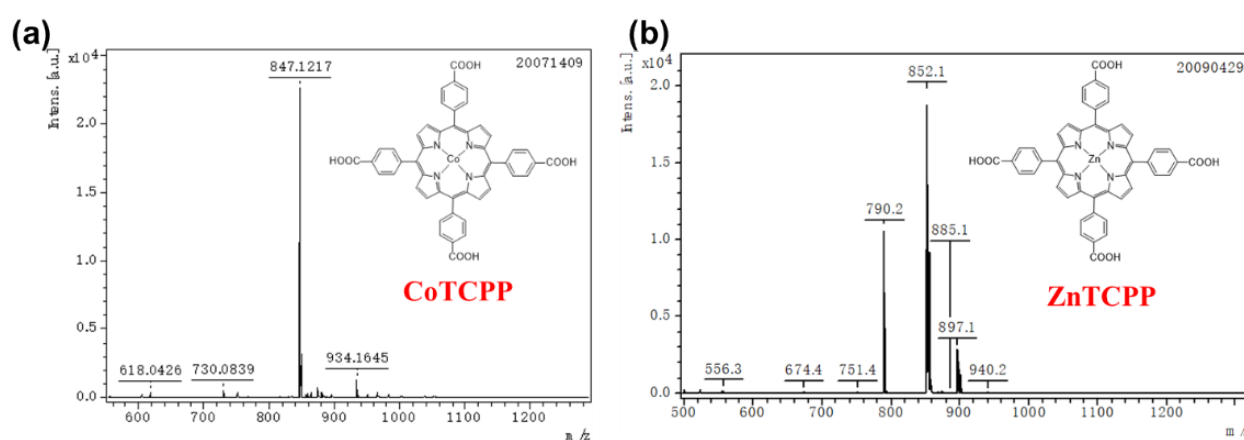

**Figure S1.** The MS of CoTCPP and ZnTCPP molecules.

**Table S1** ICP results of ZnCo-BMOF.

| ICP                                   | Zn (%) | Co (%) |
|---------------------------------------|--------|--------|
| Zn-MOF                                | 11.22  | 0      |
| Zn <sub>20</sub> Co <sub>1</sub> -MOF | 10.95  | 0.06   |
| Zn <sub>10</sub> Co <sub>1</sub> -MOF | 10.80  | 0.13   |
| Zn <sub>1</sub> Co <sub>1</sub> -MOF  | 8.67   | 2.51   |
| Co-MOF                                | 8.13   | 3.58   |

The content of C, N, H, and O in Zn<sub>10</sub>Co<sub>1</sub>-BMOF were 53.66%, 7.67%, 4.303%, 21.08%, respectively.

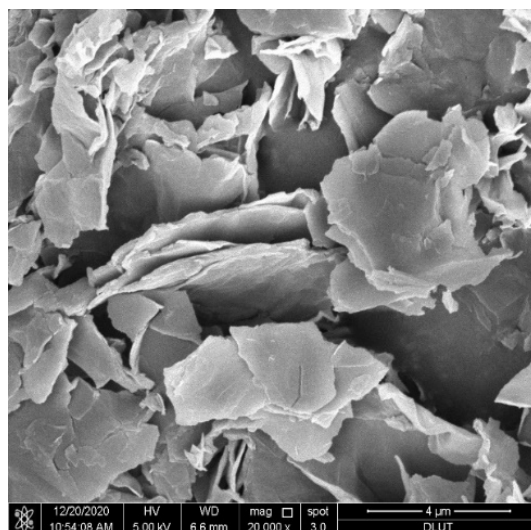

**Figure S2.** SEM image of  $\text{Zn}_{10}\text{Co}_1\text{-BMOF}$ .

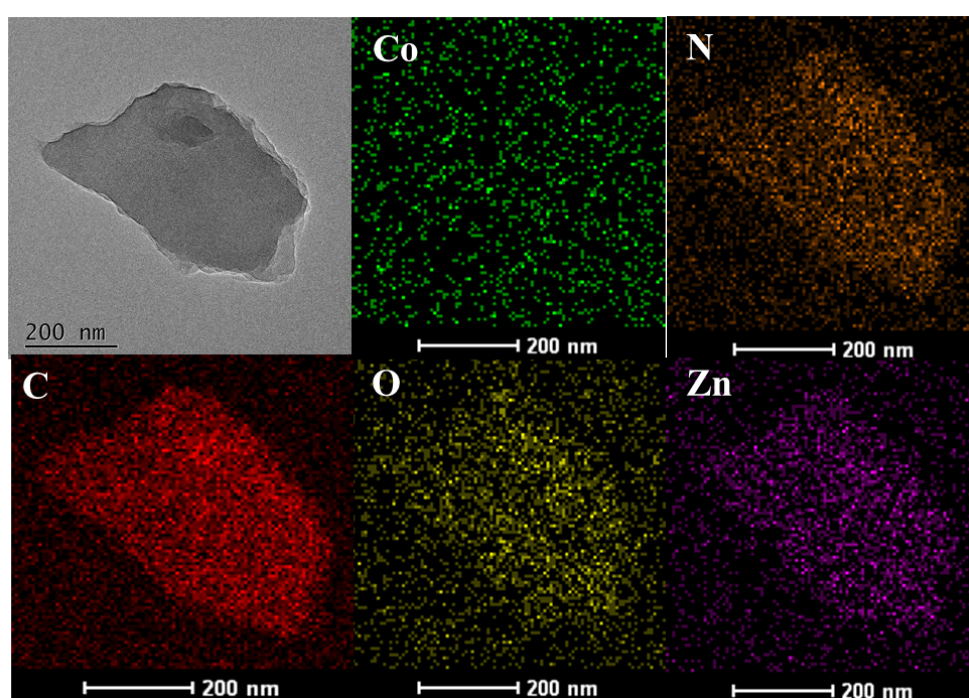

**Figure S3.** TEM image of  $\text{Zn}_{10}\text{Co}_1\text{-BMOF}$  and corresponding to EDS mapping images.

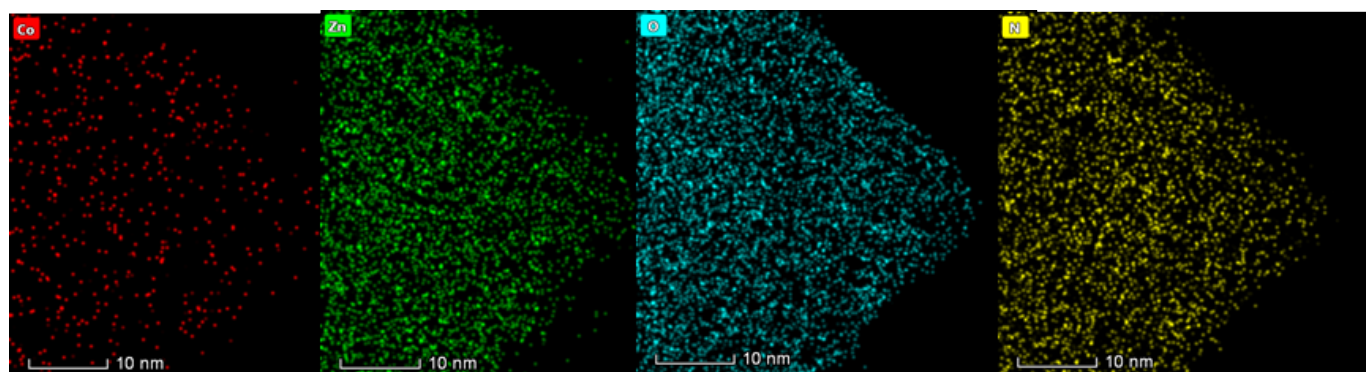

**Figure S4.** EDS elemental mapping images of HAADF-STEM image.

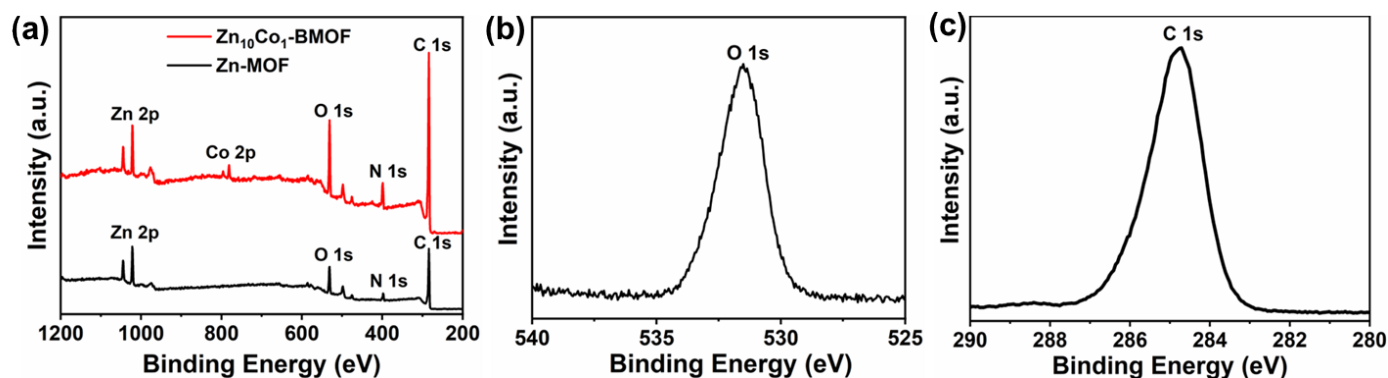

**Figure S5.** (a) XPS survey of  $\text{Zn}_{10}\text{Co}_1\text{-BMOF}$  and  $\text{Zn-MOF}$  (b) XPS of O 1s; (c) XPS of C1s.

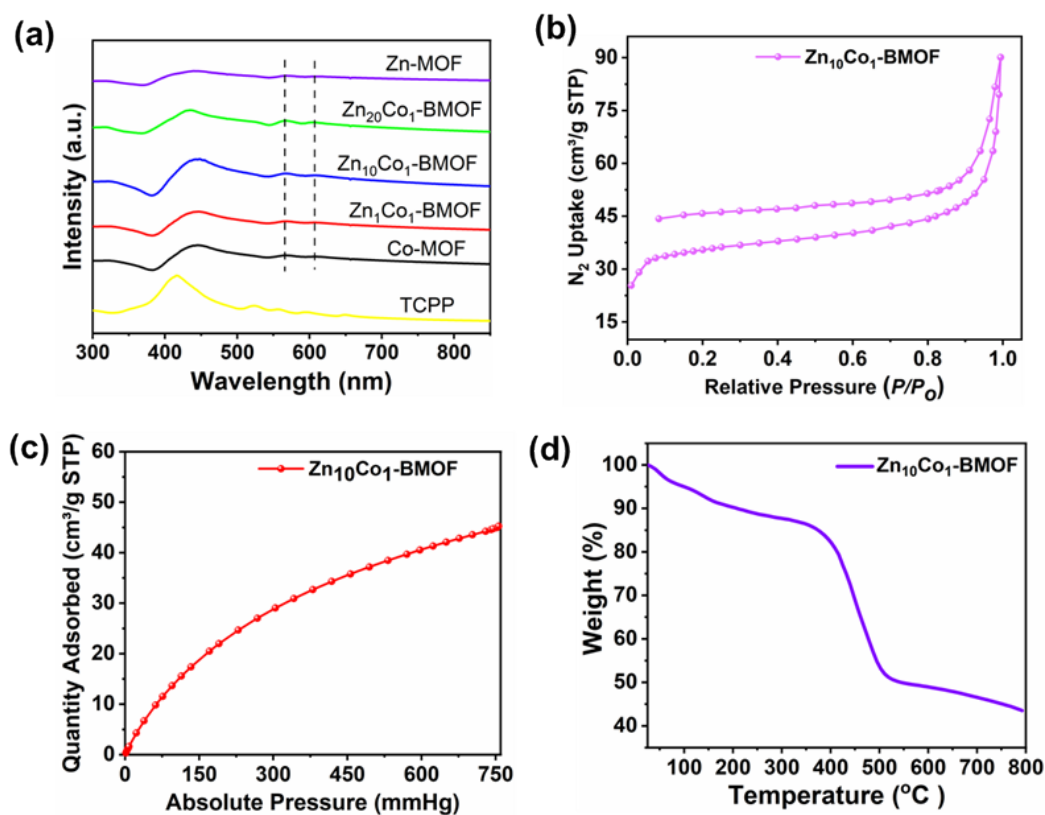

**Figure S6.** (a) UV-vis spectra of  $\text{Zn-MOF}$ ,  $\text{Zn}_{20}\text{Co}_1\text{-BMOF}$ ,  $\text{Zn}_{10}\text{Co}_1\text{-BMOF}$ ,  $\text{Zn}_1\text{Co}_1\text{-BMOF}$  and  $\text{Co-MOF}$ ; (b)  $\text{N}_2$  adsorption isotherms of  $\text{Zn}_{10}\text{Co}_1\text{-BMOF}$ ; (c)  $\text{CO}_2$  adsorption of  $\text{Zn}_{10}\text{Co}_1\text{-BMOF}$ ; (d) Thermogravimetric (TG) analysis of  $\text{Zn}_{10}\text{Co}_1\text{-BMOF}$ .

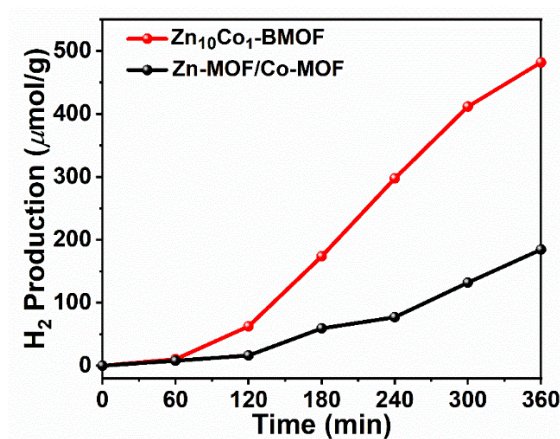

**Figure S7.** H<sub>2</sub> production comparisons between Zn<sub>10</sub>Co<sub>1</sub>-BMOF nanosheets and Zn-MOF/Co-MOF system for photocatalytic CO<sub>2</sub> reduction 6 h.

<sup>a</sup> The selectivity of CO by Zn<sub>10</sub>Co<sub>1</sub>-BMOF was 61.7%.

**Table S2** The comparison of photocatalytic performance for CO<sub>2</sub> reduction of in one MOF platform.

| Catalyst                               | Product             | Evolution rate<br>( $\mu\text{mol g}^{-1}\text{ h}^{-1}$ ) | Reference                                  |
|----------------------------------------|---------------------|------------------------------------------------------------|--------------------------------------------|
| (Co/Ru) <sub>2.4</sub> -UiO-67(bpydc)  | CO                  | 282.5                                                      | Appl. Catal. B, 2019, 245,<br>496–501      |
|                                        | H <sub>2</sub>      | 570.1                                                      |                                            |
| MOF-525-Co                             | CH <sub>4</sub>     | 36.67                                                      | Angew. Chem. Int. Ed.<br>, 2016, 55, 14310 |
|                                        | CO                  | 200.6                                                      |                                            |
| PCN-222                                | HCOO <sup>-</sup>   | 60                                                         | J. Am. Chem. Soc.,<br>2015, 137, 13440     |
| Ru-MOF-253-Re                          | CO                  | 111.5                                                      | Inorg. Chem., 2018,<br>57, 8276            |
|                                        | HCOO·H <sub>2</sub> | 475                                                        |                                            |
|                                        |                     | 5.5                                                        |                                            |
| Zn <sub>10</sub> Co <sub>1</sub> -BMOF | CO                  | 129.6                                                      | This work                                  |
|                                        | H <sub>2</sub>      | 80.3                                                       |                                            |

**Table S3** Control experiments for photocatalytic CO<sub>2</sub> reduction

| Condition                     | CO ( $\mu\text{mol}$ ) | H <sub>2</sub> ( $\mu\text{mol}$ ) |
|-------------------------------|------------------------|------------------------------------|
| Normal reaction               | 7.78                   | 4.81                               |
| Without catalyst              | 0.07                   | /                                  |
| Ar instead of CO <sub>2</sub> | /                      | /                                  |
| Without PS                    | 0.15                   | 0.19                               |
| Without BIH                   | /                      | /                                  |
| Without TEOA                  | 0.75                   | 1.86                               |
| In the dark                   | /                      | /                                  |
| Without bpy                   | /                      | /                                  |

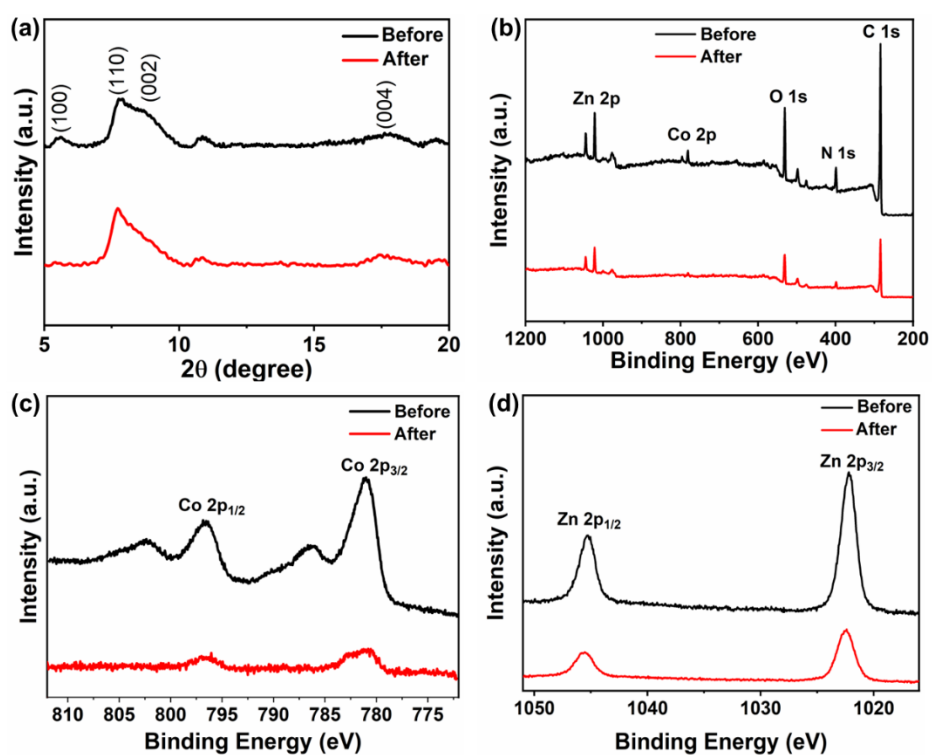**Figure S8.** Zn<sub>10</sub>Co<sub>1</sub>-BMOF before and after 6 h photocatalytic CO<sub>2</sub> reduction (a) XRD; (b) XPS survey; (c) Co 2p XPS; (d) Zn 2p XPS image.

**Table S4** ICP results of Zn<sub>10</sub>Co<sub>1</sub>-BMOF before and after photocatalysis.

| ICP    | Zn (%) | Co (%) |
|--------|--------|--------|
| Before | 10.80  | 0.13   |
| After  | 9.92   | 0.11   |

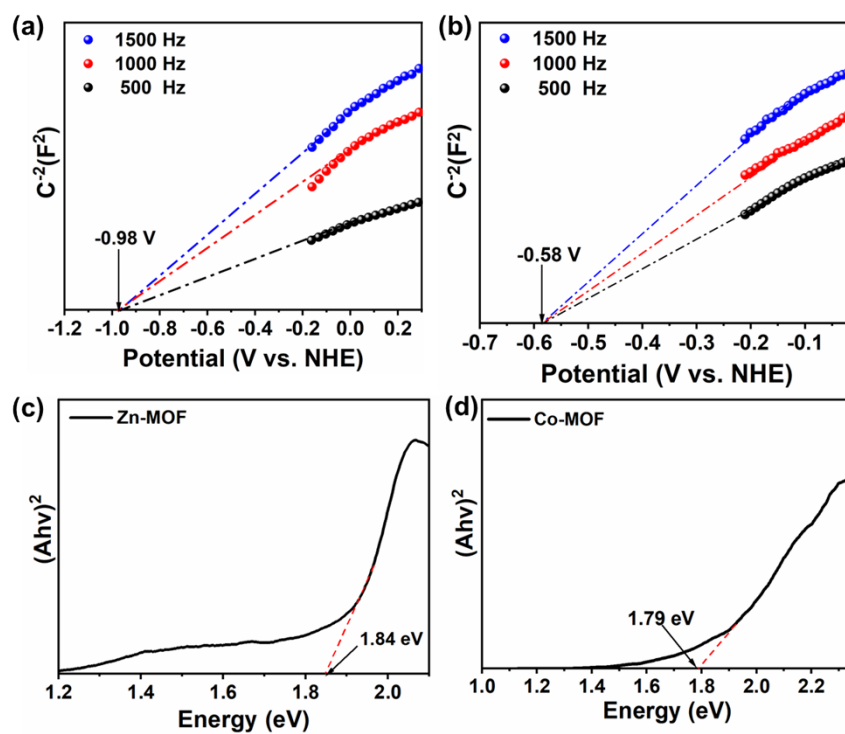

**Figure S9.** (a) and (b) Mott-Schottky measurements of Zn-MOF and Co-MOF; (c) and (d) UV-vis spectra of Zn-MOF and Co-MOF.
